# Supplementary material
Source: PubMed Central journal article supplement (PMC5844321)
Supplement: 1037FileS7.pdf [file 1037FileS7.pdf]

**SUPPORTING INFORMATION**

| <b>Table S1.</b> | <b>Yeast Strains</b>                                                                             |                                   |                  |
|------------------|--------------------------------------------------------------------------------------------------|-----------------------------------|------------------|
| <b>Strains</b>   | <b>Genotype</b>                                                                                  | <b>Derived from Parent Strain</b> | <b>Reference</b> |
| SDBY1420         | <i>MATa his3Δ leu2Δ0 LYS2 met15Δ0 ura3Δ0 set1Δ::HphMX</i>                                        | (81)                              | (81)             |
| SDBY1500         | <i>MATa his3Δ leu2Δ0 LYS2 met15Δ0 ura3Δ0 set3Δ::KanMX</i>                                        | BY4741                            | This Study       |
| SDBY1501         | <i>MATa his3Δ leu2Δ0 LYS2 met15Δ0 ura3Δ0 set4Δ::KanMX</i>                                        | BY4741                            | This Study       |
| SDBY1502         | <i>MATa his3Δ leu2Δ0 LYS2 met15Δ0 ura3Δ0 set4Δ::HphMX set3Δ::KanMX</i>                           | BY4741                            | This Study       |
| SDBY1503         | <i>MATa his3Δ leu2Δ0 LYS2 met15Δ0 ura3Δ0 set1Δ::HphMX set4Δ::KanMX</i>                           | BY4741                            | This Study       |
| SDBY1504         | <i>MATa his3Δ leu2Δ0 LYS2 met15Δ0 ura3Δ0 SET4::loxP-KanMX- P<sub>PYK1</sub>-loxP-3xFLAG-SET4</i> | BY4741                            | This Study       |
| SDBY1505         | <i>MATa his3Δ leu2Δ0 LYS2 met15Δ0 ura3Δ0 SET3::loxP-KanMX- P<sub>PYK1</sub>-loxP-3xFLAG-SET3</i> | BY4741                            | This Study       |
| SDBY1506         | <i>MATa his3Δ leu2Δ0 LYS2 met15Δ0 ura3Δ0 SET4::loxP-3xFLAG-SET4</i>                              | BY4741                            | This Study       |
| SDBY1507         | <i>MATa his3Δ leu2Δ0 LYS2 met15Δ0 ura3Δ0 SET3::loxP-3xFLAG-SET3</i>                              | BY4741                            | This Study       |
| SDBY1508         | <i>MATa ura3Δ his3Δ200 leu2Δ0 lys2-128δ HAP1 set4Δ::HphMX</i>                                    | FY2609                            | This Study       |
| SDBY1509         | <i>MATa ura3Δ his3Δ200 leu2Δ0 lys2-128δ HAP1 upc2Δ::KanMX</i>                                    | FY2609                            | This Study       |
| SDBY1510         | <i>MATa ura3Δ his3Δ200 leu2Δ0 lys2-128δ HAP1 set4Δ::HphMX upc2Δ::KanMX</i>                       | FY2609                            | This Study       |
| SDBY1511         | <i>MATa his3Δ leu2Δ0 LYS2 met15Δ0 ura3Δ0 upc2Δ::KanMX</i>                                        | BY4741                            | This Study       |
| SDBY1512         | <i>MATa his3Δ leu2Δ0 LYS2 met15Δ0 ura3Δ0 upc2Δ::KanMX ecm22Δ::LEU2</i>                           | BY4741                            | This Study       |
| SDBY1513         | <i>MATa his3Δ leu2Δ0 LYS2 met15Δ0 ura3Δ0 SET4::loxP-3xFLAG-SET4 upc2Δ::KanMX</i>                 | BY4741                            | This Study       |
| SDBY1514         | <i>MATa his3Δ leu2Δ0 LYS2 met15Δ0 ura3Δ0 SET4::loxP-3xFLAG-SET4 ecm22Δ::LEU2</i>                 | BY4741                            | This Study       |
| SDBY1515         | <i>MATa his3Δ leu2Δ0 LYS2 met15Δ0 ura3Δ0 SET4::loxP-3xFLAG-SET4 upc2Δ::KanMX ecm22Δ::LEU2</i>    | BY4741                            | This Study       |
| SDBY1516         | <i>MATa his3Δ leu2Δ0 LYS2 met15Δ0 ura3Δ0 erg6Δ::NatMX</i>                                        | BY4741                            | This Study       |
| SDBY1517         | <i>MATa his3Δ leu2Δ0 LYS2 met15Δ0 ura3Δ0 erg2Δ::LEU2</i>                                         | BY4741                            | This Study       |
| SDBY1518         | <i>MATa his3Δ leu2Δ0 LYS2 met15Δ0 ura3Δ0 erg3Δ::HphMX</i>                                        | BY4741                            | This Study       |
| SDBY1519         | <i>MATa ura3Δ his3Δ200 leu2Δ0 lys2-128δ HAP1 SET4::loxP-3xFLAG-SET4</i>                          | FY2609                            | This Study       |
| SDBY1520         | <i>MATa ura3Δ his3Δ200 leu2Δ0 lys2-128δ SET4::loxP-3xFLAG-SET4 hap1Δ::KanMX</i>                  | FY2609                            | This Study       |

## SUPPORTING INFORMATION

|               |                                                                                               |        |                                 |
|---------------|-----------------------------------------------------------------------------------------------|--------|---------------------------------|
| SDBY1521      | <i>MATα his3Δ leu2Δ0 LYS2 met15Δ0 ura3Δ0 SET4::loxP-3xFLAG-SET4 erg3Δ::HphMX</i>              | BY4741 | This Study                      |
| SDBY1522      | <i>MATα his3Δ leu2Δ0 LYS2 met15Δ0 ura3Δ0 SET4::loxP-3xFLAG-SET4 upc2Δ::KanMX erg3Δ::HphMX</i> | BY4741 | This Study                      |
| FY2609        | <i>MATα ura3Δ his3Δ200 leu2Δ0 lys2-128δ HAP1</i>                                              | FY2609 | (17)                            |
| FY2613        | <i>MATα ura3Δ his3Δ200 leu2Δ0 lys2-128δ myc-HAP1</i>                                          | FY2613 | (17)                            |
| FY2611        | <i>MATα ura3Δ his3Δ200 leu2Δ0 lys2-128δ hap1Δ::KanMX</i>                                      | FY2611 | (17)                            |
| FY2673        | <i>MATα ura3Δ his3Δ200 leu2Δ0 lys2-128δ HAP1 tup1Δ::KanMX</i>                                 | FY2609 | (17)                            |
| FY2983        | <i>MATα ura3Δ his3Δ200 leu2Δ0 lys2-128δ HAP1 upc2-1</i>                                       | FY2609 | Kindly provided by Fred Winston |
| BY4741        | <i>MATα his3Δ leu2Δ0 LYS2 met15Δ0 ura3Δ0</i>                                                  | BY4741 | Open Biosystems                 |
| <i>ysp2Δ</i>  | <i>MATα his3Δ leu2Δ0 LYS2 met15Δ0 ura3Δ0 ysp2Δ::KanMX</i>                                     | BY4741 | Open Biosystems                 |
| <i>erg5Δ</i>  | <i>MATα his3Δ leu2Δ0 LYS2 met15Δ0 ura3Δ0 erg5Δ::KanMX</i>                                     | BY4741 | Open Biosystems                 |
| <i>erg4Δ</i>  | <i>MATα his3Δ leu2Δ0 LYS2 met15Δ0 ura3Δ0 erg4Δ::KanMX</i>                                     | BY4741 | Open Biosystems                 |
| <i>ecm22Δ</i> | <i>MATα his3Δ leu2Δ0 LYS2 met15Δ0 ura3Δ0 ecm22Δ::KanMX</i>                                    | BY4741 | Open Biosystems                 |

**Note: The BY4741 strain contains a *hap1-Ty1* gene fusion. The FY2609 strain contains a full length *HAP1* sequence.**

## SUPPORTING INFORMATION

**Table S2. Plasmids**

| Plasmid | Inserted Gene      | Promoter    | Vector | Source     |
|---------|--------------------|-------------|--------|------------|
| pRS416  | None               |             | pRS416 | This Study |
| pRS416  | <i>SET4-3XFLAG</i> | <i>SET4</i> | pRS416 | This Study |

**Table S3. Primers for qRT-PCR**

| Primer Name       | Sequence                  |
|-------------------|---------------------------|
| <i>ACT1-001F</i>  | TGGATTCCGGTGATGGTGTT      |
| <i>ACT1-002R</i>  | TCAAATGGCGTGAGGTAGAGA     |
| <i>18S-001F</i>   | TGGTGCATGGCCGTTCTT        |
| <i>18S-002R</i>   | GGTCTCGTTCGTTATCGCAATT    |
| <i>SET1-001F</i>  | GCAGCCTTTAGTGCCGTTAGA     |
| <i>SET1-002R</i>  | CTTGAAGCCCATGATAAAGCAA    |
| <i>SET2-001F</i>  | ACGTCGCAGCCAGCAAA         |
| <i>SET2-002R</i>  | TCTCCCAGCCTGGAGGTAATC     |
| <i>SET3-001F</i>  | TCGGGACAGAGCATCGAGTAC     |
| <i>SET3-002R</i>  | TGTCCTGATCCGTTGAAAAGC     |
| <i>SET4-001F</i>  | CGTCAGCAGTGCAGCTTCAG      |
| <i>SET4-002R</i>  | TGTATTGAATGTCCTTATCGGCATA |
| <i>SET5-001F</i>  | ACGGCCAGGTATATCATTGGAT    |
| <i>SET5-002R</i>  | TTGCTCAATATAGGCGTTTGGTT   |
| <i>SET6-001F</i>  | GGATACCGCGCATCAACAA       |
| <i>SET6-002R</i>  | CGCAAGTGGGTGGTAATTGATT    |
| <i>ERG11-001F</i> | CACGAATTTGTCTTCAACGCTAA   |
| <i>ERG11-002R</i> | AGTCAAATGAGCGTAAGCAGCTT   |
| <i>ERG3-001F</i>  | GCTCTGCACAAGCCTCATCA      |
| <i>ERG3-002R</i>  | GGAAAGAATGAGATGCGAAAGG    |
| <i>UPC2-001F</i>  | CGGTAGCGTGGAGTCTGATTC     |
| <i>UPC2-002R</i>  | CGGTGTCTGCTCCTTCTTGAT     |

## SUPPORTING INFORMATION

| <b>Table S4</b>             | <b>Probe sets for ChIP Analysis</b>                                                                      |
|-----------------------------|----------------------------------------------------------------------------------------------------------|
| <b>Probe Name</b>           | <b>Sequence 5'-3'</b>                                                                                    |
| <i>ERG11 Promoter -600</i>  | /56-FAM/CCTTTATTC/ZEN/CCGACTAAGCCGTACGA/3IABkFQ<br>TCTGTACGAAAATGAGGCCAG<br>GCCTTTAAGATTGTCCAACCC        |
| <i>ERG11 5'</i>             | /56-FAM/TGGGCCAAT/ZEN/GGTAAGCCAAGAAATG/3IABkFQ<br>TTGGAGAGGCATTGGAATACG<br>TCCTTTCTCAAAGAATATAGTAATTGCC  |
| <i>ERG11 3'</i>             | /56-FAM/ACCGTTCCA/ZEN/CCTCCTGACTTTACATCT/3IABkFQ<br>TTTGTTCTGGATTTCTCTTTTCCC<br>AAATGGCATTACCCAGAGGG     |
| <i>ERG3 Promoter -358</i>   | /56-FAM/ATTTCCGGTC/ZEN/GTTTAGTTGCGCCC/3IABkFQ<br>TGCCCTTGCATCGCTG<br>CTCGTATACACCCCGGTTG                 |
| <i>ERG3 5'</i>              | /56-FAM/TGTACGCTA/ZEN/AAGTTCTGCCCGCT/3IABkFQ<br>AGAAGTCGCTGACCATTATGTC<br>CAATTTCTGCCACTTGACAGG          |
| <i>ERG3 3'</i>              | /56-FAM/CCTGCCACA/ZEN/CGGTTCCACCATCTAT/3IABkFQ<br>ACCTATCAAACAATCCTGCCG<br>CAATGAGTCATCTGGTCTACGG        |
| <i>ARS504</i>               | /56-FAM/TTGGTCTTC/ZEN/CCTACGCATTTCCCC/3IABkFQ/<br>GCCGTTTCAATCTATCGTCATG<br>ATCCAGCTGACTCATTTCTG         |
| <i>CTT1 Promoter -288</i>   | /56-FAM/AATAACCCT/ZEN/TCTGGATCGGCGACG/3IABkFQ/<br>AAGCGGTGAAATTGCGTATTG<br>TTCAGCATACGAATAGTACTGGC       |
| <i>SPS100 Promoter -488</i> | /56-FAM/CAGACGCTT/ZEN/CCCTTGAAAATCGCC/3IABkFQ/<br>GCGTCATTTGTCTGCGTTAAG<br>TGTCACTTCGGCTTAGCTTC          |
| <i>PMA1 Promoter</i>        | /56-FAM/CCGCTTATG/ZEN/CTCCCCTCCATTAGTT/3IABkFQ/<br>TGACGAAACGTGGTCGATG<br>AAATTAGATGTTAGACGATAATGATAGGAC |

## SUPPORTING INFORMATION

**Table S5. Data analysis**

| <b>Figure 2A: qRT-PCR</b> |               |                  |                |                           |                       |                |
|---------------------------|---------------|------------------|----------------|---------------------------|-----------------------|----------------|
| <b>Gene</b>               | <b>Strain</b> | <b>Condition</b> | <b>Mean RQ</b> | <b>Standard Deviation</b> | <b>Standard Error</b> | <b>P-Value</b> |
| <i>SET4</i>               | WT            | DMSO             | 1.024          | 0.232                     | 0.095                 | N.S.           |
| <i>SET4</i>               | WT            | (+) ketoconazole | 14.292         | 3.801                     | 1.552                 | P<0.0001       |
| <b>Figure 2B: qRT-PCR</b> |               |                  |                |                           |                       |                |
| <b>Gene</b>               | <b>Strain</b> | <b>Condition</b> | <b>Mean RQ</b> | <b>Standard Deviation</b> | <b>Standard Error</b> | <b>P-Value</b> |
| <i>SET1</i>               | WT            | DMSO             | 0.913          | 0.235                     | 0.117                 | N.S.           |
| <i>SET1</i>               | WT            | (+) ketoconazole | 0.819          | 0.134                     | 0.067                 | N.S.           |
| <i>SET2</i>               | WT            | DMSO             | 1.164          | 0.160                     | 0.080                 | N.S.           |
| <i>SET2</i>               | WT            | (+) ketoconazole | 0.780          | 0.221                     | 0.110                 | P<0.05         |
| <i>SET3</i>               | WT            | DMSO             | 1.019          | 0.077                     | 0.039                 | N.S.           |
| <i>SET3</i>               | WT            | (+) ketoconazole | 0.834          | 0.220                     | 0.110                 | N.S.           |
| <i>SET4</i>               | WT            | DMSO             | 1.030          | 0.118                     | 0.059                 | N.S.           |
| <i>SET4</i>               | WT            | (+) ketoconazole | 8.654          | 0.781                     | 0.391                 | P<0.0001       |
| <i>SET5</i>               | WT            | DMSO             | 1.098          | 0.123                     | 0.062                 | N.S.           |
| <i>SET5</i>               | WT            | (+) ketoconazole | 0.832          | 0.241                     | 0.120                 | N.S.           |
| <i>SET6</i>               | WT            | DMSO             | 1.099          | 0.131                     | 0.066                 | N.S.           |
| <i>SET6</i>               | WT            | (+) ketoconazole | 0.773          | 0.305                     | 0.153                 | N.S.           |
| <b>Figure 2C: qRT-PCR</b> |               |                  |                |                           |                       |                |
| <b>Gene</b>               | <b>Strain</b> | <b>Condition</b> | <b>Mean RQ</b> | <b>Standard Deviation</b> | <b>Standard Error</b> | <b>P-Value</b> |
| <i>SET4</i>               | WT            | DMSO             | 1.003          | 0.097                     | 0.056                 | N.S.           |
| <i>SET4</i>               | WT            | (+) keto 3 hrs   | 8.949          | 4.697                     | 2.712                 | P<0.05         |
| <i>SET4</i>               | WT            | (+) keto 6 hrs   | 19.513         | 5.948                     | 3.434                 | P<0.01         |
| <i>SET4</i>               | WT            | (+) keto 9 hrs   | 21.053         | 6.387                     | 3.688                 | P<0.01         |
| <i>SET4</i>               | WT            | (+) keto 12 hrs  | 20.278         | 7.419                     | 4.283                 | P<0.01         |

**SUPPORTING INFORMATION**

**Figure 2E-H: qRT-PCR**

| Gene         | Strain        | Condition        | Mean RQ | Standard Deviation | Standard Error | P-Value |
|--------------|---------------|------------------|---------|--------------------|----------------|---------|
| <i>ERG11</i> | WT            | DMSO             | 1.032   | 0.328              | 0.189          | N.S.    |
| <i>ERG11</i> | <i>set4</i> Δ | DMSO             | 0.980   | 0.238              | 0.137          | N.S.    |
| <i>ERG11</i> | WT            | (+) ketoconazole | 4.703   | 1.489              | 0.860          | N.S.    |
| <i>ERG11</i> | <i>set4</i> Δ | (+) ketoconazole | 4.993   | 1.367              | 0.789          | N.S.    |
| <i>ERG3</i>  | WT            | DMSO             | 1.004   | 0.103              | 0.060          | N.S.    |
| <i>ERG3</i>  | <i>set4</i> Δ | DMSO             | 0.972   | 0.233              | 0.134          | N.S.    |
| <i>ERG3</i>  | WT            | (+) ketoconazole | 7.779   | 1.139              | 0.658          | N.S.    |
| <i>ERG3</i>  | <i>set4</i> Δ | (+) ketoconazole | 7.264   | 0.614              | 0.354          | N.S.    |
| <i>PDR5</i>  | WT            | DMSO             | 1.098   | 0.612              | 0.353          | N.S.    |
| <i>PDR5</i>  | <i>set4</i> Δ | DMSO             | 1.097   | 0.337              | 0.195          | N.S.    |
| <i>PDR5</i>  | WT            | (+) ketoconazole | 2.139   | 0.568              | 0.328          | N.S.    |
| <i>PDR5</i>  | <i>set4</i> Δ | (+) ketoconazole | 1.998   | 1.013              | 0.585          | N.S.    |
| <i>PDR11</i> | WT            | DMSO             | 1.013   | 0.190              | 0.110          | N.S.    |
| <i>PDR11</i> | <i>set4</i> Δ | DMSO             | 0.798   | 0.157              | 0.090          | N.S.    |
| <i>PDR11</i> | WT            | (+) ketoconazole | 3.279   | 1.261              | 0.728          | N.S.    |
| <i>PDR11</i> | <i>set4</i> Δ | (+) ketoconazole | 3.505   | 1.195              | 0.690          | N.S.    |

**Figure 3A: qRT-PCR**

| Gene        | Strain | Condition | Mean RQ | Standard Deviation | Standard Error | P-Value  |
|-------------|--------|-----------|---------|--------------------|----------------|----------|
| <i>SET4</i> | WT     | aerobic   | 1.021   | 0.283              | 0.141          | N.S.     |
| <i>SET4</i> | WT     | hypoxia   | 230.092 | 42.206             | 21.103         | P<0.0001 |

**Figure 3B: qRT-PCR**

| Gene        | Strain | Condition | Mean RQ | Standard Deviation | Standard Error | P-Value  |
|-------------|--------|-----------|---------|--------------------|----------------|----------|
| <i>SET1</i> | WT     | aerobic   | 1.001   | 0.049              | 0.028          | N.S.     |
| <i>SET1</i> | WT     | hypoxia   | 1.108   | 0.071              | 0.041          | N.S.     |
| <i>SET2</i> | WT     | aerobic   | 1.136   | 0.736              | 0.425          | N.S.     |
| <i>SET2</i> | WT     | hypoxia   | 0.666   | 0.067              | 0.039          | N.S.     |
| <i>SET3</i> | WT     | aerobic   | 1.016   | 0.214              | 0.124          | N.S.     |
| <i>SET3</i> | WT     | hypoxia   | 0.975   | 0.520              | 0.300          | N.S.     |
| <i>SET4</i> | WT     | aerobic   | 1.009   | 0.170              | 0.098          | N.S.     |
| <i>SET4</i> | WT     | hypoxia   | 225.578 | 13.338             | 7.701          | P<0.0001 |
| <i>SET5</i> | WT     | aerobic   | 1.020   | 0.248              | 0.143          | N.S.     |
| <i>SET5</i> | WT     | hypoxia   | 1.102   | 0.416              | 0.240          | N.S.     |
| <i>SET6</i> | WT     | aerobic   | 1.014   | 0.205              | 0.119          | N.S.     |
| <i>SET6</i> | WT     | hypoxia   | 1.956   | 0.862              | 0.498          | N.S.     |

## SUPPORTING INFORMATION

**Figure 5A: qRT-PCR**

| Gene         | Strain | Condition     | Mean RQ | Standard Deviation | Standard Error | P-Value |
|--------------|--------|---------------|---------|--------------------|----------------|---------|
| <i>ERG11</i> | WT     | aerobic       | 1.028   | 0.275              | 0.137          | N.S.    |
| <i>ERG11</i> | WT     | hypoxia 3 hrs | 1.154   | 0.285              | 0.142          | N.S.    |
| <i>ERG11</i> | WT     | hypoxia 6 hrs | 0.375   | 0.128              | 0.064          | P<0.05  |
| <i>ERG11</i> | WT     | hypoxia 9 hrs | 0.172   | 0.084              | 0.042          | P<0.01  |

**Figure 5B: qRT-PCR**

| Gene        | Strain | Condition     | Mean RQ | Standard Deviation | Standard Error | P-Value |
|-------------|--------|---------------|---------|--------------------|----------------|---------|
| <i>ERG3</i> | WT     | aerobic       | 1.025   | 0.258              | 0.129          | N.S.    |
| <i>ERG3</i> | WT     | hypoxia 3 hrs | 0.754   | 0.231              | 0.116          | N.S.    |
| <i>ERG3</i> | WT     | hypoxia 6 hrs | 0.211   | 0.102              | 0.051          | P<0.01  |
| <i>ERG3</i> | WT     | hypoxia 9 hrs | 0.094   | 0.047              | 0.024          | P<0.005 |

**Figure 5C: qRT-PCR**

| Gene         | Strain       | Condition     | Mean RQ | Standard Deviation | Standard Error | P-Value |
|--------------|--------------|---------------|---------|--------------------|----------------|---------|
| <i>ERG11</i> | <i>set4Δ</i> | aerobic       | 1.001   | 0.295              | 0.147          | N.S.    |
| <i>ERG11</i> | <i>set4Δ</i> | hypoxia 3 hrs | 0.938   | 0.262              | 0.131          | N.S.    |
| <i>ERG11</i> | <i>set4Δ</i> | hypoxia 6 hrs | 3.383   | 0.841              | 0.421          | P<0.005 |
| <i>ERG11</i> | <i>set4Δ</i> | hypoxia 9 hrs | 4.409   | 1.401              | 0.701          | P<0.005 |

**Figure 5D: qRT-PCR**

| Gene        | Strain       | Condition     | Mean RQ | Standard Deviation | Standard Error | P-Value |
|-------------|--------------|---------------|---------|--------------------|----------------|---------|
| <i>ERG3</i> | <i>set4Δ</i> | aerobic       | 0.946   | 0.182              | 0.091          | N.S.    |
| <i>ERG3</i> | <i>set4Δ</i> | hypoxia 3 hrs | 1.226   | 0.324              | 0.162          | N.S.    |
| <i>ERG3</i> | <i>set4Δ</i> | hypoxia 6 hrs | 4.394   | 0.947              | 0.473          | P<0.005 |
| <i>ERG3</i> | <i>set4Δ</i> | hypoxia 9 hrs | 6.017   | 1.528              | 0.764          | P<0.005 |

**Figure 5E: qRT-PCR**

| Gene         | Strain            | Condition | Mean RQ | Standard Deviation | Standard Error | P-Value |
|--------------|-------------------|-----------|---------|--------------------|----------------|---------|
| <i>ERG11</i> | WT                | hypoxia   | 1.003   | 0.090              | 0.052          | N.S.    |
| <i>ERG11</i> | <i>set4Δ</i>      | hypoxia   | 4.674   | 0.946              | 0.546          | P<0.005 |
| <i>ERG11</i> | <i>upc2Δ</i>      | hypoxia   | 0.546   | 0.147              | 0.085          | P<0.05  |
| <i>ERG11</i> | <i>set4Δupc2Δ</i> | hypoxia   | 1.052   | 0.267              | 0.154          | N.S.    |

**Figure 5F: qRT-PCR**

| Gene         | Strain            | Condition | Mean RQ | Standard Deviation | Standard Error | P-Value |
|--------------|-------------------|-----------|---------|--------------------|----------------|---------|
| <i>ERG11</i> | WT                | hypoxia   | 1.012   | 0.184              | 0.107          | N.S.    |
| <i>ERG11</i> | <i>set4Δ</i>      | hypoxia   | 3.399   | 0.394              | 0.227          | P<0.005 |
| <i>ERG11</i> | <i>upc2Δ</i>      | hypoxia   | 0.450   | 0.155              | 0.089          | P<0.05  |
| <i>ERG11</i> | <i>set4Δupc2Δ</i> | hypoxia   | 1.049   | 0.116              | 0.067          | N.S.    |

**SUPPORTING INFORMATION**

**Figure 5I: ChIP**

| Gene                     | Strain      | Condition | Mean RQ | Standard Deviation | Standard Error | P-Value  |
|--------------------------|-------------|-----------|---------|--------------------|----------------|----------|
| <i>ERG11</i><br>Promoter | WT          | hypoxia   | 0.498   | 0.441              | 0.197          | N.S.     |
| <i>ERG11</i><br>Promoter | 3xFLAG-Set4 | hypoxia   | 91.875  | 23.718             | 10.607         | P<0.0001 |
| <i>ERG11 5'</i>          | WT          | hypoxia   | 0.332   | 0.942              | 0.421          | N.S.     |
| <i>ERG11 5'</i>          | 3xFLAG-Set4 | hypoxia   | 5.506   | 7.514              | 3.360          | P<0.01   |
| <i>ERG11 3'</i>          | WT          | hypoxia   | 0.520   | 0.407              | 0.182          | N.S.     |
| <i>ERG11 3'</i>          | 3xFLAG-Set4 | hypoxia   | 10.180  | 13.409             | 5.997          | P<0.05   |

**Figure 5J: ChIP**

| Gene                    | Strain      | Condition | Mean RQ | Standard Deviation | Standard Error | P-Value  |
|-------------------------|-------------|-----------|---------|--------------------|----------------|----------|
| <i>ERG3</i><br>Promoter | WT          | hypoxia   | 0.507   | 0.443              | 0.198          | N.S.     |
| <i>ERG3</i><br>Promoter | 3xFLAG-Set4 | hypoxia   | 77.861  | 14.409             | 6.444          | P<0.0001 |
| <i>ERG3 5'</i>          | WT          | hypoxia   | 0.564   | 0.196              | 0.088          | N.S.     |
| <i>ERG3 5'</i>          | 3xFLAG-Set4 | hypoxia   | 13.606  | 11.230             | 5.022          | P<0.01   |
| <i>ERG3 3'</i>          | WT          | hypoxia   | 0.566   | 0.184              | 0.082          | N.S.     |
| <i>ERG3 3'</i>          | 3xFLAG-Set4 | hypoxia   | 3.134   | 6.944              | 3.105          | P<0.05   |

**Figure 6A: qRT-PCR**

| Gene         | Strain       | Condition | Mean RQ | Standard Deviation | Standard Error | P-Value |
|--------------|--------------|-----------|---------|--------------------|----------------|---------|
| <i>ERG11</i> | WT           | hypoxia   | 1.027   | 0.297              | 0.148          | N.S.    |
| <i>ERG11</i> | <i>hap1Δ</i> | hypoxia   | 10.667  | 4.100              | 2.050          | P<0.005 |
| <i>ERG11</i> | <i>tup1Δ</i> | hypoxia   | 3.703   | 0.661              | 0.330          | P<0.005 |

**Figure 6B: qRT-PCR**

| Gene        | Strain       | Condition | Mean RQ | Standard Deviation | Standard Error | P-Value  |
|-------------|--------------|-----------|---------|--------------------|----------------|----------|
| <i>ERG3</i> | WT           | hypoxia   | 1.008   | 0.149              | 0.074          | N.S.     |
| <i>ERG3</i> | <i>hap1Δ</i> | hypoxia   | 17.470  | 2.527              | 1.264          | P<0.0001 |
| <i>ERG3</i> | <i>tup1Δ</i> | hypoxia   | 6.087   | 1.126              | 0.563          | P<0.0001 |

**Figure 6E: ChIP**

| Gene                     | Strain   | Condition | Mean RQ | Standard Deviation | Standard Error | P-Value |
|--------------------------|----------|-----------|---------|--------------------|----------------|---------|
| <i>ERG11</i><br>Promoter | WT       | hypoxia   | 0.018   | 1.070              | 0.618          | N.S.    |
| <i>ERG11</i><br>Promoter | Myc-Hap1 | hypoxia   | 42.798  | 12.559             | 7.251          | P<0.005 |
| <i>ERG11 5'</i>          | WT       | hypoxia   | 0.896   | 2.587              | 1.494          | N.S.    |
| <i>ERG11 5'</i>          | Myc-Hap1 | hypoxia   | 3.490   | 6.877              | 3.970          | N.S.    |



**SUPPORTING INFORMATION**

**Figure 6E: ChIP**

| Gene                    | Strain   | Condition | Mean RQ | Standard Deviation | Standard Error | P-Value |
|-------------------------|----------|-----------|---------|--------------------|----------------|---------|
| <i>ERG3</i><br>Promoter | WT       | hypoxia   | 0.124   | 0.723              | 0.417          | N.S.    |
| <i>ERG3</i><br>Promoter | Myc-Hap1 | hypoxia   | 55.036  | 14.701             | 8.487          | P<0.005 |
| <i>ERG3</i> 5'          | WT       | hypoxia   | 0.145   | 1.534              | 0.886          | N.S.    |
| <i>ERG3</i> 5'          | Myc-Hap1 | hypoxia   | 2.471   | 4.770              | 2.754          | N.S.    |

**Figure 6G: ChIP**

| Gene                     | Strain                    | Condition | Mean RQ | Standard Deviation | Standard Error | P-Value  |
|--------------------------|---------------------------|-----------|---------|--------------------|----------------|----------|
| <i>ERG11</i><br>Promoter | WT                        | hypoxia   | 0.725   | 1.303              | 0.456          | N.S.     |
| <i>ERG11</i><br>Promoter | 3xFLAG-Set4               | hypoxia   | 95.111  | 17.865             | 15.875         | P<0.0001 |
| <i>ERG11</i><br>Promoter | <i>hap1</i> Δ 3xFLAG-Set4 | hypoxia   | 7.094   | 5.492              | 2.537          |          |
| <i>ERG11</i> 5'          | WT                        | hypoxia   | 1.118   | 2.490              | 0.830          | N.S.     |
| <i>ERG11</i> 5'          | 3xFLAG-Set4               | hypoxia   | 26.716  | 22.484             | 8.767          | N.S.     |
| <i>ERG11</i> 5'          | <i>hap1</i> Δ 3xFLAG-Set4 | hypoxia   | 30.708  | 23.913             | 8.922          |          |

**Figure 6H: ChIP**

| Gene                    | Strain                    | Condition | Mean RQ | Standard Deviation | Standard Error | P-Value  |
|-------------------------|---------------------------|-----------|---------|--------------------|----------------|----------|
| <i>ERG3</i><br>Promoter | WT                        | hypoxia   | 0.363   | 0.849              | 0.275          | N.S.     |
| <i>ERG3</i><br>Promoter | 3xFLAG-Set4               | hypoxia   | 89.994  | 21.407             | 16.102         | P<0.0001 |
| <i>ERG3</i><br>Promoter | <i>hap1</i> Δ 3xFLAG-Set4 | hypoxia   | 5.359   | 6.810              | 2.255          |          |
| <i>ERG3</i> 5'          | WT                        | hypoxia   | 1.231   | 2.812              | 0.930          | N.S.     |
| <i>ERG3</i> 5'          | 3xFLAG-Set4               | hypoxia   | 11.192  | 16.989             | 7.038          | N.S.     |
| <i>ERG3</i> 5'          | <i>hap1</i> Δ 3xFLAG-Set4 | hypoxia   | 13.799  | 3.033              | 10.262         |          |

**Figure 7B: qRT-PCR**

| Gene        | Strain                       | Condition | Mean RQ | Standard Deviation | Standard Error | P-Value |
|-------------|------------------------------|-----------|---------|--------------------|----------------|---------|
| <i>SET4</i> | WT                           | hypoxia   | 1.022   | 0.247              | 0.124          | N.S.    |
| <i>SET4</i> | <i>upc2</i> Δ                | hypoxia   | 0.318   | 0.160              | 0.080          | P<0.01  |
| <i>SET4</i> | <i>ecm22</i> Δ               | hypoxia   | 1.139   | 0.327              | 0.164          | N.S.    |
| <i>SET4</i> | <i>upc2</i> Δ <i>ecm22</i> Δ | hypoxia   | 0.007   | 0.002              | 0.001          | P<0.005 |

**Figure 7D: qRT-PCR**

| Gene        | Strain                       | Condition        | Mean RQ | Standard Deviation | Standard Error | P-Value |
|-------------|------------------------------|------------------|---------|--------------------|----------------|---------|
| <i>SET4</i> | WT                           | (+) ketoconazole | 1.035   | 0.309              | 0.179          | N.S.    |
| <i>SET4</i> | <i>upc2</i> Δ                | (+) ketoconazole | 0.105   | 0.039              | 0.023          | P<0.01  |
| <i>SET4</i> | <i>ecm22</i> Δ               | (+) ketoconazole | 1.265   | 0.353              | 0.204          | N.S.    |
| <i>SET4</i> | <i>upc2</i> Δ <i>ecm22</i> Δ | (+) ketoconazole | 0.032   | 0.011              | 0.007          | P<0.005 |

## SUPPORTING INFORMATION

**Figure 8B: qRT-PCR**

| Gene        | Strain        | Condition | Mean RQ | Standard Deviation | Standard Error | P-Value  |
|-------------|---------------|-----------|---------|--------------------|----------------|----------|
| <i>SET4</i> | WT            | aerobic   | 1.003   | 0.084              | 0.042          | N.S.     |
| <i>SET4</i> | <i>erg6</i> Δ | aerobic   | 2.539   | 0.487              | 0.244          | P<0.0005 |
| <i>SET4</i> | <i>erg2</i> Δ | aerobic   | 1.787   | 0.445              | 0.223          | P<0.05   |
| <i>SET4</i> | <i>erg3</i> Δ | aerobic   | 9.430   | 0.950              | 0.475          | P<0.0001 |
| <i>SET4</i> | <i>erg5</i> Δ | aerobic   | 1.387   | 0.156              | 0.078          | P<0.005  |
| <i>SET4</i> | <i>erg4</i> Δ | aerobic   | 0.854   | 0.086              | 0.043          | N.S.     |

**Figure 8D: qRT-PCR**

| Gene        | Strain        | Condition | Mean RQ | Standard Deviation | Standard Error | P-Value  |
|-------------|---------------|-----------|---------|--------------------|----------------|----------|
| <i>UPC2</i> | WT            | aerobic   | 1.032   | 0.297              | 0.149          | N.S.     |
| <i>UPC2</i> | <i>erg6</i> Δ | aerobic   | 3.747   | 0.786              | 0.393          | P<0.005  |
| <i>UPC2</i> | <i>erg2</i> Δ | aerobic   | 5.197   | 1.408              | 0.704          | P<0.005  |
| <i>UPC2</i> | <i>erg3</i> Δ | aerobic   | 5.686   | 1.184              | 0.592          | P<0.0005 |
| <i>UPC2</i> | <i>erg5</i> Δ | aerobic   | 1.627   | 1.070              | 0.535          | N.S.     |
| <i>UPC2</i> | <i>erg4</i> Δ | aerobic   | 0.814   | 0.144              | 0.072          | N.S.     |

**Figure 8E: qRT-PCR**

| Gene        | Strain                      | Condition | Mean RQ | Standard Deviation | Standard Error | P-Value  |
|-------------|-----------------------------|-----------|---------|--------------------|----------------|----------|
| <i>SET4</i> | WT                          | aerobic   | 1.017   | 0.220              | 0.127          | N.S.     |
| <i>SET4</i> | <i>erg3</i> Δ               | aerobic   | 10.569  | 1.146              | 0.662          | P<0.0001 |
| <i>SET4</i> | <i>upc2</i> Δ               | aerobic   | 1.392   | 0.094              | 0.054          | N.S.     |
| <i>SET4</i> | <i>erg3</i> Δ <i>upc2</i> Δ | aerobic   | 1.986   | 0.316              | 0.182          | N.S.     |

**Figure S1B: qRT-PCR**

| Gene        | Strain                    | Condition | Mean RQ | Standard Deviation | Standard Error | P-Value  |
|-------------|---------------------------|-----------|---------|--------------------|----------------|----------|
| <i>SET4</i> | WT                        | aerobic   | 1.162   | 0.124              | 0.062          | N.S.     |
| <i>SET4</i> | <i>PYK1p::3xFLAG-Set4</i> | aerobic   | 612.043 | 45.834             | 22.917         | P<0.0001 |
| <i>SET3</i> | WT                        | aerobic   | 1.139   | 0.126              | 0.063          | N.S.     |
| <i>SET3</i> | <i>PYK1p::3xFLAG-Set3</i> | aerobic   | 54.952  | 8.382              | 4.191          | P<0.0001 |

**Figure S2A: qRT-PCR**

| Gene         | Strain                      | Condition | Mean RQ | Standard Deviation | Standard Error | P-Value |
|--------------|-----------------------------|-----------|---------|--------------------|----------------|---------|
| <i>ERG11</i> | WT                          | hypoxia   | 1.024   | 0.282              | 0.162          | N.S.    |
| <i>ERG11</i> | <i>set4</i> Δ               | hypoxia   | 5.392   | 1.294              | 0.747          | P<0.05  |
| <i>ERG11</i> | <i>set3</i> Δ               | hypoxia   | 0.908   | 0.238              | 0.137          | N.S.    |
| <i>ERG11</i> | <i>set4</i> Δ <i>set3</i> Δ | hypoxia   | 5.954   | 1.210              | 0.698          | P<0.05  |

## SUPPORTING INFORMATION

**Figure S2B: qRT-PCR**

| <b>Gene</b> | <b>Strain</b>                             | <b>Condition</b> | <b>Mean RQ</b> | <b>Standard Deviation</b> | <b>Standard Error</b> | <b>P-Value</b> |
|-------------|-------------------------------------------|------------------|----------------|---------------------------|-----------------------|----------------|
| <i>ERG3</i> | WT                                        | hypoxia          | 1.007          | 0.146                     | 0.084                 | N.S.           |
| <i>ERG3</i> | <i>set4</i> $\Delta$                      | hypoxia          | 5.837          | 0.658                     | 0.380                 | P<0.005        |
| <i>ERG3</i> | <i>set3</i> $\Delta$                      | hypoxia          | 0.888          | 0.214                     | 0.124                 | N.S.           |
| <i>ERG3</i> | <i>set4</i> $\Delta$ <i>set3</i> $\Delta$ | hypoxia          | 5.322          | 1.154                     | 0.666                 | P<0.005        |
